# Supplementary material for: Improving multimorbidity measurement using individualized disease-specific quality of life impact assessments: predictive validity of a new comorbidity index
Source: Springer Nature journal article supplement (doi:10.1186/s12955-022-02016-7), 2022-07-12
Supplement: MOESM1 [file 23258974]

## Chronic Conditions and How They Affect You

Have you ever been told by a doctor or other health professional that you had any of the following conditions?

On the left, please answer NO or YES for each condition. If YES, on the right, please answer the question for each condition you have.

| Please answer NO or YES for each condition                                             |                          |                          | If YES | If YES, in the past 4 weeks, how much did this CONDITION limit your everyday activities or your quality of life? |                          |                          |                          |                          |
|----------------------------------------------------------------------------------------|--------------------------|--------------------------|--------|------------------------------------------------------------------------------------------------------------------|--------------------------|--------------------------|--------------------------|--------------------------|
| CONDITION                                                                              | NO                       | YES                      |        | Not at all                                                                                                       | A little                 | Some                     | A lot                    | Extremely                |
| Hypertension, sometimes called high blood pressure                                     | <input type="checkbox"/> | <input type="checkbox"/> | ➔      | <input type="checkbox"/>                                                                                         | <input type="checkbox"/> | <input type="checkbox"/> | <input type="checkbox"/> | <input type="checkbox"/> |
| A heart attack in the last year, also called myocardial infarction                     | <input type="checkbox"/> | <input type="checkbox"/> | ➔      | <input type="checkbox"/>                                                                                         | <input type="checkbox"/> | <input type="checkbox"/> | <input type="checkbox"/> | <input type="checkbox"/> |
| Congestive heart failure or enlarged heart                                             | <input type="checkbox"/> | <input type="checkbox"/> | ➔      | <input type="checkbox"/>                                                                                         | <input type="checkbox"/> | <input type="checkbox"/> | <input type="checkbox"/> | <input type="checkbox"/> |
| Diabetes or high blood sugar                                                           | <input type="checkbox"/> | <input type="checkbox"/> | ➔      | <input type="checkbox"/>                                                                                         | <input type="checkbox"/> | <input type="checkbox"/> | <input type="checkbox"/> | <input type="checkbox"/> |
| Angina (An-JI-na or AN-ji-na)                                                          | <input type="checkbox"/> | <input type="checkbox"/> | ➔      | <input type="checkbox"/>                                                                                         | <input type="checkbox"/> | <input type="checkbox"/> | <input type="checkbox"/> | <input type="checkbox"/> |
| Stroke                                                                                 | <input type="checkbox"/> | <input type="checkbox"/> | ➔      | <input type="checkbox"/>                                                                                         | <input type="checkbox"/> | <input type="checkbox"/> | <input type="checkbox"/> | <input type="checkbox"/> |
| Cancer, except skin cancer                                                             | <input type="checkbox"/> | <input type="checkbox"/> | ➔      | <input type="checkbox"/>                                                                                         | <input type="checkbox"/> | <input type="checkbox"/> | <input type="checkbox"/> | <input type="checkbox"/> |
| Asthma                                                                                 | <input type="checkbox"/> | <input type="checkbox"/> | ➔      | <input type="checkbox"/>                                                                                         | <input type="checkbox"/> | <input type="checkbox"/> | <input type="checkbox"/> | <input type="checkbox"/> |
| Chronic Obstructive Pulmonary Disease (COPD)                                           | <input type="checkbox"/> | <input type="checkbox"/> | ➔      | <input type="checkbox"/>                                                                                         | <input type="checkbox"/> | <input type="checkbox"/> | <input type="checkbox"/> | <input type="checkbox"/> |
| Kidney Disease                                                                         | <input type="checkbox"/> | <input type="checkbox"/> | ➔      | <input type="checkbox"/>                                                                                         | <input type="checkbox"/> | <input type="checkbox"/> | <input type="checkbox"/> | <input type="checkbox"/> |
| Rheumatoid arthritis                                                                   | <input type="checkbox"/> | <input type="checkbox"/> | ➔      | <input type="checkbox"/>                                                                                         | <input type="checkbox"/> | <input type="checkbox"/> | <input type="checkbox"/> | <input type="checkbox"/> |
| Osteoarthritis, degenerative arthritis                                                 | <input type="checkbox"/> | <input type="checkbox"/> | ➔      | <input type="checkbox"/>                                                                                         | <input type="checkbox"/> | <input type="checkbox"/> | <input type="checkbox"/> | <input type="checkbox"/> |
| Osteoporosis                                                                           | <input type="checkbox"/> | <input type="checkbox"/> | ➔      | <input type="checkbox"/>                                                                                         | <input type="checkbox"/> | <input type="checkbox"/> | <input type="checkbox"/> | <input type="checkbox"/> |
| Ulcer or stomach disease such as gastritis or duodenitis                               | <input type="checkbox"/> | <input type="checkbox"/> | ➔      | <input type="checkbox"/>                                                                                         | <input type="checkbox"/> | <input type="checkbox"/> | <input type="checkbox"/> | <input type="checkbox"/> |
| Liver infection (Hepatitis B or C)                                                     | <input type="checkbox"/> | <input type="checkbox"/> | ➔      | <input type="checkbox"/>                                                                                         | <input type="checkbox"/> | <input type="checkbox"/> | <input type="checkbox"/> | <input type="checkbox"/> |
| Irritable bowel syndrome (or functional bowel syndrome or other chronic bowel disease) | <input type="checkbox"/> | <input type="checkbox"/> | ➔      | <input type="checkbox"/>                                                                                         | <input type="checkbox"/> | <input type="checkbox"/> | <input type="checkbox"/> | <input type="checkbox"/> |
| Obesity                                                                                | <input type="checkbox"/> | <input type="checkbox"/> | ➔      | <input type="checkbox"/>                                                                                         | <input type="checkbox"/> | <input type="checkbox"/> | <input type="checkbox"/> | <input type="checkbox"/> |
| HIV or AIDS                                                                            | <input type="checkbox"/> | <input type="checkbox"/> | ➔      | <input type="checkbox"/>                                                                                         | <input type="checkbox"/> | <input type="checkbox"/> | <input type="checkbox"/> | <input type="checkbox"/> |
| Anemia                                                                                 | <input type="checkbox"/> | <input type="checkbox"/> | ➔      | <input type="checkbox"/>                                                                                         | <input type="checkbox"/> | <input type="checkbox"/> | <input type="checkbox"/> | <input type="checkbox"/> |
| Clinical depression                                                                    | <input type="checkbox"/> | <input type="checkbox"/> | ➔      | <input type="checkbox"/>                                                                                         | <input type="checkbox"/> | <input type="checkbox"/> | <input type="checkbox"/> | <input type="checkbox"/> |
| Chronic fatigue syndrome (CFS)                                                         | <input type="checkbox"/> | <input type="checkbox"/> | ➔      | <input type="checkbox"/>                                                                                         | <input type="checkbox"/> | <input type="checkbox"/> | <input type="checkbox"/> | <input type="checkbox"/> |
| Fibromyalgia (FM)                                                                      | <input type="checkbox"/> | <input type="checkbox"/> | ➔      | <input type="checkbox"/>                                                                                         | <input type="checkbox"/> | <input type="checkbox"/> | <input type="checkbox"/> | <input type="checkbox"/> |
| Migraine headaches                                                                     | <input type="checkbox"/> | <input type="checkbox"/> | ➔      | <input type="checkbox"/>                                                                                         | <input type="checkbox"/> | <input type="checkbox"/> | <input type="checkbox"/> | <input type="checkbox"/> |
| Enlarged prostate or Benign prostate (BPH)                                             | <input type="checkbox"/> | <input type="checkbox"/> | ➔      | <input type="checkbox"/>                                                                                         | <input type="checkbox"/> | <input type="checkbox"/> | <input type="checkbox"/> | <input type="checkbox"/> |

## Chronic Conditions and How They Affect You

Do you now have any of the following conditions?

On the left, please answer NO or YES for each condition. If YES, on the right, please answer the question for each condition you have.

| Please answer NO or YES for each condition                                                 |                          |                          | If YES | If YES, in the past 4 weeks, how much did this CONDITION limit your everyday activities or your quality of life? |                          |                          |                          |                          |
|--------------------------------------------------------------------------------------------|--------------------------|--------------------------|--------|------------------------------------------------------------------------------------------------------------------|--------------------------|--------------------------|--------------------------|--------------------------|
| CONDITION                                                                                  | NO                       | YES                      |        | Not at all                                                                                                       | A little                 | Some                     | A lot                    | Extremely                |
| Hypothyroidism or underactive thyroid condition                                            | <input type="checkbox"/> | <input type="checkbox"/> | ➔      | <input type="checkbox"/>                                                                                         | <input type="checkbox"/> | <input type="checkbox"/> | <input type="checkbox"/> | <input type="checkbox"/> |
| Chronic allergies or sinus trouble                                                         | <input type="checkbox"/> | <input type="checkbox"/> | ➔      | <input type="checkbox"/>                                                                                         | <input type="checkbox"/> | <input type="checkbox"/> | <input type="checkbox"/> | <input type="checkbox"/> |
| Seasonal allergies, such as hay fever                                                      | <input type="checkbox"/> | <input type="checkbox"/> | ➔      | <input type="checkbox"/>                                                                                         | <input type="checkbox"/> | <input type="checkbox"/> | <input type="checkbox"/> | <input type="checkbox"/> |
| Chronic back problems or sciatica                                                          | <input type="checkbox"/> | <input type="checkbox"/> | ➔      | <input type="checkbox"/>                                                                                         | <input type="checkbox"/> | <input type="checkbox"/> | <input type="checkbox"/> | <input type="checkbox"/> |
| Trouble seeing, even when wearing glasses or contact lenses; blind or unable to see at all | <input type="checkbox"/> | <input type="checkbox"/> | ➔      | <input type="checkbox"/>                                                                                         | <input type="checkbox"/> | <input type="checkbox"/> | <input type="checkbox"/> | <input type="checkbox"/> |
| Deafness or other trouble hearing with one or both ears                                    | <input type="checkbox"/> | <input type="checkbox"/> | ➔      | <input type="checkbox"/>                                                                                         | <input type="checkbox"/> | <input type="checkbox"/> | <input type="checkbox"/> | <input type="checkbox"/> |
| Dermatitis or other chronic skin conditions                                                | <input type="checkbox"/> | <input type="checkbox"/> | ➔      | <input type="checkbox"/>                                                                                         | <input type="checkbox"/> | <input type="checkbox"/> | <input type="checkbox"/> | <input type="checkbox"/> |
| Limitation in the use of an arm or leg (missing, paralyzed, or weakness)                   | <input type="checkbox"/> | <input type="checkbox"/> | ➔      | <input type="checkbox"/>                                                                                         | <input type="checkbox"/> | <input type="checkbox"/> | <input type="checkbox"/> | <input type="checkbox"/> |
| Joint problems of the foot or ankle                                                        | <input type="checkbox"/> | <input type="checkbox"/> | ➔      | <input type="checkbox"/>                                                                                         | <input type="checkbox"/> | <input type="checkbox"/> | <input type="checkbox"/> | <input type="checkbox"/> |
| Joint problems of the hip or knee                                                          | <input type="checkbox"/> | <input type="checkbox"/> | ➔      | <input type="checkbox"/>                                                                                         | <input type="checkbox"/> | <input type="checkbox"/> | <input type="checkbox"/> | <input type="checkbox"/> |
